# Supplementary material for: Study of the Fatty Acid Profile of Milk in Different Sheep Breeds: Evaluation by Multivariate Factorial Analysis
Source: MDPI journal article supplement (doi:10.3390/ani12060722), 2022-03-13
Supplement: s1 [file s1]

# Study of the fatty acid profile of milk in different sheep breeds: evaluation by Multivariate Factorial Analysis

Giuseppe Conte, Valentino Palombo, Andrea Serra, Fabio Correddu, Mariasilvia D'Andrea, Nicolò Pietro Paolo Macciotta, and Marcello Mele

**Supplementary Table S1.** Feeding system details and feed composition

|                                | Massese                                                                  | Comisana                                                                 | Sarda (Tuscany)                                                          | Sarda (Sardinia)                                                                    |
|--------------------------------|--------------------------------------------------------------------------|--------------------------------------------------------------------------|--------------------------------------------------------------------------|-------------------------------------------------------------------------------------|
| Pasture Botanical composition  | <i>Avena sativa</i><br><i>Lolium italicum</i><br><i>Trifolium repens</i> | <i>Avena sativa</i><br><i>Lolium italicum</i><br><i>Trifolium repens</i> | <i>Avena sativa</i><br><i>Lolium italicum</i><br><i>Trifolium repens</i> | <i>Lolium multiflorum</i><br><i>Hedisarum coronarium</i><br><i>Cyborium intybus</i> |
| DM (%)                         | 9.0                                                                      | 9.0                                                                      | 9.0                                                                      | 22.3                                                                                |
| CP (%)                         | 14.6                                                                     | 14.6                                                                     | 14.6                                                                     | 18.2                                                                                |
| CF (%)                         | 3.0                                                                      | 3.0                                                                      | 3.0                                                                      | 1.5                                                                                 |
| Ash (%)                        | 10.9                                                                     | 10.9                                                                     | 10.9                                                                     | 10.4                                                                                |
| NDF (%)                        | 42.2                                                                     | 42.2                                                                     | 42.2                                                                     | 42.5                                                                                |
| ADF (%)                        | 25.6                                                                     | 25.6                                                                     | 25.6                                                                     | 25.2                                                                                |
| ADL (%)                        | 4.0                                                                      | 4.0                                                                      | 4.0                                                                      | 3.0                                                                                 |
| Concentrate amount             | ~ 800 g/head                                                             | ~ 800 g/head                                                             | ~ 800 g/head                                                             | ~ 800 g/head                                                                        |
| DM (%)                         | 90.0                                                                     | 90.0                                                                     | 90.0                                                                     | 91.9                                                                                |
| CP (%)                         | 17.9                                                                     | 17.9                                                                     | 17.9                                                                     | 17.7                                                                                |
| CF (%)                         | 2.9                                                                      | 2.9                                                                      | 2.9                                                                      | 3.3                                                                                 |
| Ash (%)                        | 7.8                                                                      | 7.8                                                                      | 7.8                                                                      | 6.9                                                                                 |
| NDF (%)                        | 24.3                                                                     | 24.3                                                                     | 24.3                                                                     | 17.0                                                                                |
| NSC (%)                        | 32.7                                                                     | 32.7                                                                     | 32.7                                                                     | 31.8                                                                                |
| NEL (Mcal kg <sup>-1</sup> DM) | 1.5                                                                      | 1.5                                                                      | 1.5                                                                      | 2.0                                                                                 |
| C16:0                          | 17.8                                                                     | 17.8                                                                     | 17.8                                                                     | 15.3                                                                                |
| C18:0                          | 3.8                                                                      | 3.8                                                                      | 3.8                                                                      | 2.0                                                                                 |
| C18:1c9                        | 21.9                                                                     | 21.9                                                                     | 21.9                                                                     | 23.0                                                                                |
| C18:2c9c12                     | 47.9                                                                     | 47.9                                                                     | 47.9                                                                     | 54.1                                                                                |
| C18:3c9c12c15                  | 4.3                                                                      | 4.3                                                                      | 4.3                                                                      | 3.5                                                                                 |

Abbreviations: DM, dry matter; CP, crude protein; CF, crude fat; NDF, neutral detergent fibre; NSC, non structural carbohydrates; NEL, net energy lactation. Fatty acid values are given as g/100 g of total fatty acid.

**Supplementary Table S2.** Descriptive statistics for individual milk fatty acids (g/100g of total lipids) of Massese breed (n = 118)

|            | Mean  | SD   | CV%   | P5    | P95   | kurtosis |
|------------|-------|------|-------|-------|-------|----------|
| C4:0       | 3.28  | 0.60 | 18.33 | 2.32  | 4.73  | 0.70     |
| C6:0       | 1.55  | 0.48 | 30.76 | 0.83  | 2.27  | 0.07     |
| C8:0       | 2.01  | 0.50 | 24.76 | 1.28  | 2.21  | 0.07     |
| C10:0      | 6.04  | 1.70 | 28.11 | 3.32  | 8.64  | 0.35     |
| C10:1c9    | 0.08  | 0.05 | 58.12 | 0.03  | 0.19  | 4.85     |
| C12:0      | 3.68  | 0.91 | 24.73 | 2.31  | 4.94  | 0.72     |
| C13:0      | 0.09  | 0.04 | 47.91 | 0.04  | 0.19  | 2.72     |
| C14:0      | 9.51  | 1.92 | 20.21 | 6.28  | 12.36 | 0.41     |
| C14:0iso   | 0.11  | 0.03 | 28.09 | 0.07  | 0.18  | 0.28     |
| C14:1c9    | 0.57  | 0.09 | 16.37 | 0.39  | 0.60  | 3.57     |
| C15:0      | 1.07  | 0.25 | 23.08 | 0.68  | 1.57  | 3.21     |
| C16:0iso   | 0.25  | 0.05 | 20.73 | 0.16  | 0.34  | 0.69     |
| C16:0      | 22.44 | 3.01 | 13.38 | 17.56 | 26.97 | 0.47     |
| C16:1c9    | 0.86  | 0.41 | 48.12 | 0.27  | 1.59  | -0.63    |
| C18:0      | 10.11 | 4.31 | 42.57 | 6.56  | 13.12 | 34.58    |
| C18:1 t6-8 | 0.13  | 0.06 | 48.53 | 0.03  | 0.26  | 0.20     |
| C18:1t9    | 0.20  | 0.08 | 38.51 | 0.05  | 0.35  | 0.24     |
| C18:1t10   | 0.31  | 0.21 | 66.13 | 0.05  | 0.78  | 5.53     |
| C18:1t11   | 2.13  | 1.28 | 60.31 | 0.58  | 4.61  | -0.71    |
| C18:1c9    | 17.96 | 2.71 | 15.11 | 14.35 | 22.12 | 2.59     |
| C18:1t15   | 0.20  | 0.06 | 29.91 | 0.11  | 0.31  | 0.28     |
| C18:1c12   | 0.14  | 0.06 | 42.34 | 0.06  | 0.24  | 0.68     |
| C18:2n6    | 2.28  | 0.86 | 37.57 | 0.97  | 3.60  | 0.54     |
| C20:0      | 0.22  | 0.10 | 44.97 | 0.14  | 0.38  | 39.21    |
| C18:3n3    | 0.81  | 0.35 | 42.46 | 0.27  | 1.37  | -1.03    |
| C18:2c9t11 | 1.12  | 0.53 | 47.71 | 0.40  | 2.19  | -0.74    |
| C20:1c11   | 0.05  | 0.03 | 54.59 | 0.00  | 0.10  | 1.88     |
| C21:0      | 0.06  | 0.02 | 35.92 | 0.02  | 0.10  | 0.82     |
| C20:4n6    | 0.11  | 0.04 | 37.28 | 0.06  | 0.19  | 0.80     |
| C20:5n3    | 0.08  | 0.04 | 53.59 | 0.03  | 0.14  | -1.23    |
| C24:0      | 0.05  | 0.02 | 44.30 | 0.02  | 0.08  | 4.54     |
| C22:5n3    | 0.11  | 0.04 | 33.94 | 0.06  | 0.18  | 0.66     |
| C22:6n3    | 0.03  | 0.03 | 97.69 | 0.00  | 0.08  | 3.55     |

SD= Standard Deviation; CV%= coefficient of variation; P5= 5<sup>th</sup> percentile; P95= 95<sup>th</sup> percentile

**Supplementary Table S3.** Descriptive statistics for individual milk fatty acids (g/100g of total lipids) of Comisana breed (n = 303)

|            | Mean  | SD   | CV%   | P5    | P95   | kurtosis |
|------------|-------|------|-------|-------|-------|----------|
| C4:0       | 4.06  | 0.82 | 20.22 | 2.85  | 5.42  | 0.40     |
| C6:0       | 2.09  | 0.36 | 17.49 | 1.55  | 2.75  | 0.08     |
| C8:0       | 1.73  | 0.37 | 21.61 | 1.15  | 2.37  | 0.74     |
| C10:0      | 4.89  | 1.16 | 23.81 | 3.05  | 6.99  | 0.70     |
| C10:1c9    | 0.18  | 0.06 | 32.31 | 0.09  | 0.29  | -0.03    |
| C12:0      | 2.80  | 0.51 | 18.40 | 2.08  | 3.68  | 1.23     |
| C13:0      | 0.06  | 0.01 | 14.65 | 0.05  | 0.08  | 0.67     |
| C14:0      | 8.59  | 0.92 | 10.66 | 7.22  | 10.19 | 0.16     |
| C14:0iso   | 0.20  | 0.03 | 15.95 | 0.15  | 0.24  | 1.24     |
| C14:1c9    | 0.21  | 0.05 | 24.25 | 0.14  | 0.32  | 0.38     |
| C15:0      | 1.48  | 0.14 | 9.28  | 1.25  | 1.71  | 0.32     |
| C16:0iso   | 0.43  | 0.06 | 13.63 | 0.33  | 0.53  | -0.08    |
| C16:0      | 22.58 | 1.65 | 7.29  | 20.46 | 25.40 | 2.39     |
| C16:1c9    | 0.70  | 0.07 | 9.97  | 0.58  | 0.81  | -0.16    |
| C18:0      | 9.45  | 1.31 | 13.83 | 7.32  | 11.41 | 1.46     |
| C18:1 t6-8 | 0.23  | 0.04 | 16.42 | 0.17  | 0.30  | 0.54     |
| C18:1t9    | 0.26  | 0.03 | 12.52 | 0.21  | 0.31  | 0.09     |
| C18:1t10   | 0.42  | 0.06 | 14.78 | 0.32  | 0.53  | 0.59     |
| C18:1t11   | 1.94  | 0.42 | 21.37 | 1.32  | 2.72  | 0.17     |
| C18:1c9    | 20.79 | 2.43 | 11.70 | 17.22 | 25.66 | 0.55     |
| C18:1t15   | 0.38  | 0.04 | 10.46 | 0.31  | 0.44  | 1.65     |
| C18:1c12   | 0.31  | 0.03 | 10.46 | 0.26  | 0.37  | 1.65     |
| C18:2n6    | 2.56  | 0.27 | 10.53 | 2.11  | 3.05  | 0.02     |
| C20:0      | 0.34  | 0.05 | 15.34 | 0.26  | 0.43  | 0.70     |
| C18:3n3    | 1.21  | 0.16 | 12.97 | 0.97  | 1.46  | 1.44     |
| C18:2c9t11 | 1.51  | 0.35 | 23.53 | 1.00  | 2.17  | 1.21     |
| C20:1c11   | 0.03  | 0.01 | 54.80 | 0.01  | 0.05  | 4.37     |
| C21:0      | 0.09  | 0.04 | 43.34 | 0.01  | 0.13  | -0.23    |
| C20:4n6    | 0.22  | 0.04 | 18.00 | 0.16  | 0.29  | 0.78     |
| C20:5n3    | 0.08  | 0.02 | 19.07 | 0.06  | 0.11  | 0.36     |
| C24:0      | 0.07  | 0.02 | 25.03 | 0.04  | 0.09  | 0.97     |
| C22:5n3    | 0.20  | 0.03 | 15.34 | 0.15  | 0.25  | 0.94     |
| C22:6n3    | 0.11  | 0.03 | 24.88 | 0.07  | 0.16  | 1.18     |

SD= Standard Deviation; CV%= coefficient of variation; P5= 5<sup>th</sup> percentile; P95= 95<sup>th</sup> percentile

**Supplementary Table S4.** Descriptive statistics for individual milk fatty acids (g/100g of total lipids) of Sarda breed reared in Tuscany (n = 133)

|            | Mean  | SD   | CV%   | P5    | P95   | kurtosis |
|------------|-------|------|-------|-------|-------|----------|
| C4:0       | 2.87  | 0.28 | 9.71  | 2.49  | 3.39  | 1.26     |
| C6:0       | 2.03  | 0.36 | 17.80 | 1.44  | 2.65  | -0.63    |
| C8:0       | 1.80  | 0.49 | 27.06 | 1.07  | 2.56  | -0.47    |
| C10:0      | 5.27  | 1.99 | 37.72 | 2.51  | 8.80  | -0.24    |
| C10:1c9    | 0.20  | 0.04 | 19.68 | 0.14  | 0.26  | -1.05    |
| C12:0      | 2.94  | 0.83 | 28.03 | 1.82  | 4.32  | 1.06     |
| C13:0      | 0.06  | 0.01 | 24.10 | 0.04  | 0.08  | -0.20    |
| C14:0      | 8.93  | 1.47 | 16.41 | 6.59  | 11.47 | -0.33    |
| C14:0iso   | 0.10  | 0.02 | 14.85 | 0.08  | 0.13  | -0.81    |
| C14:1c9    | 0.13  | 0.06 | 45.52 | 0.06  | 0.24  | 1.53     |
| C15:0      | 0.81  | 0.15 | 18.74 | 0.56  | 1.07  | -0.21    |
| C16:0iso   | 0.21  | 0.08 | 40.46 | 0.13  | 0.28  | 39.04    |
| C16:0      | 20.70 | 3.72 | 17.95 | 14.88 | 26.54 | 0.00     |
| C16:1c9    | 0.41  | 0.06 | 15.78 | 0.32  | 0.53  | -0.62    |
| C18:0      | 10.32 | 2.31 | 22.43 | 6.46  | 14.99 | 0.47     |
| C18:1 t6-8 | 0.42  | 0.19 | 44.91 | 0.17  | 0.73  | -0.99    |
| C18:1t9    | 0.42  | 0.15 | 36.49 | 0.24  | 0.69  | -0.82    |
| C18:1t10   | 0.58  | 0.17 | 30.30 | 0.35  | 0.84  | 7.43     |
| C18:1t11   | 3.56  | 2.68 | 75.16 | 1.16  | 9.69  | 1.41     |
| C18:1c9    | 18.83 | 3.62 | 19.22 | 13.10 | 24.81 | 0.72     |
| C18:1t15   | 0.48  | 0.19 | 38.76 | 0.19  | 0.82  | -0.40    |
| C18:1c12   | 0.27  | 0.05 | 19.19 | 0.19  | 0.35  | -0.41    |
| C18:2n6    | 2.10  | 0.38 | 18.15 | 1.58  | 2.74  | 0.94     |
| C20:0      | 0.20  | 0.04 | 21.11 | 0.13  | 0.27  | -0.11    |
| C18:3n3    | 1.43  | 0.66 | 46.12 | 0.56  | 2.51  | -1.15    |
| C18:2c9t11 | 1.44  | 0.91 | 63.04 | 0.59  | 3.61  | 2.45     |
| C20:1c11   | 0.05  | 0.02 | 45.85 | 0.02  | 0.09  | 14.55    |
| C21:0      | 0.06  | 0.03 | 46.36 | 0.03  | 0.10  | 30.43    |
| C20:4n6    | 0.09  | 0.03 | 37.80 | 0.04  | 0.15  | -0.36    |
| C20:5n3    | 0.05  | 0.02 | 34.20 | 0.03  | 0.08  | 1.30     |
| C24:0      | 0.05  | 0.02 | 32.73 | 0.02  | 0.08  | -0.09    |
| C22:5n3    | 0.09  | 0.02 | 25.40 | 0.06  | 0.14  | 0.60     |
| C22:6n3    | 0.04  | 0.01 | 35.49 | 0.02  | 0.06  | 1.11     |

SD= Standard Deviation; CV%= coefficient of variation; P5= 5<sup>th</sup> percentile; P95= 95<sup>th</sup> percentile

**Supplementary Table S5.** Descriptive statistics for individual milk fatty acids (g/100g of total lipids) of Sarda breed reared in Sardinia (n = 298)

|            | Mean  | SD   | CV%   | P5    | P95   | kurtosis |
|------------|-------|------|-------|-------|-------|----------|
| C4:0       | 2.67  | 0.34 | 12.62 | 2.20  | 3.17  | 0.71     |
| C6:0       | 1.82  | 0.33 | 18.07 | 1.29  | 2.37  | -0.13    |
| C8:0       | 1.70  | 0.42 | 24.74 | 1.01  | 2.36  | -0.07    |
| C10:0      | 5.93  | 1.65 | 27.81 | 3.43  | 8.70  | 0.04     |
| C10:1c9    | 0.26  | 0.08 | 30.47 | 0.15  | 0.40  | 0.57     |
| C12:0      | 3.72  | 0.97 | 26.13 | 2.30  | 5.39  | 0.66     |
| C13:0      | 0.03  | 0.01 | 33.29 | 0.02  | 0.05  | 0.71     |
| C14:0      | 11.22 | 1.42 | 12.68 | 8.96  | 13.33 | 0.16     |
| C14:0iso   | 0.12  | 0.04 | 32.89 | 0.07  | 0.20  | 0.95     |
| C14:1c9    | 0.19  | 0.07 | 37.83 | 0.09  | 0.33  | 1.19     |
| C15:0      | 1.18  | 0.18 | 15.10 | 0.86  | 1.43  | -0.03    |
| C16:0iso   | 0.34  | 0.07 | 19.94 | 0.25  | 0.46  | 0.42     |
| C16:0      | 25.65 | 2.85 | 11.10 | 21.26 | 30.37 | 0.43     |
| C16:1c9    | 0.85  | 0.21 | 25.21 | 0.55  | 1.23  | 1.14     |
| C18:0      | 10.20 | 2.24 | 21.96 | 6.43  | 13.79 | 0.14     |
| C18:1 t6-8 | 0.22  | 0.11 | 49.23 | 0.13  | 0.44  | 3.25     |
| C18:1t9    | 0.26  | 0.09 | 32.63 | 0.19  | 0.44  | 3.04     |
| C18:1t10   | 0.37  | 0.22 | 59.01 | 0.19  | 0.82  | 3.41     |
| C18:1t11   | 2.22  | 1.05 | 47.39 | 0.78  | 4.12  | 0.68     |
| C18:1c9    | 16.35 | 3.12 | 19.11 | 10.99 | 21.49 | 0.03     |
| C18:1t15   | 0.56  | 0.10 | 17.50 | 0.43  | 0.76  | 0.68     |
| C18:1c12   | 0.29  | 0.13 | 42.44 | 0.17  | 0.53  | 2.26     |
| C18:2n6    | 1.93  | 0.46 | 23.96 | 1.28  | 2.67  | 0.76     |
| C20:0      | 0.29  | 0.10 | 33.76 | 0.15  | 0.47  | 0.72     |
| C18:3n3    | 0.96  | 0.55 | 57.82 | 0.38  | 2.11  | 1.53     |
| C18:2c9t11 | 1.07  | 0.50 | 46.29 | 0.45  | 1.98  | 1.15     |
| C20:1c11   | 0.03  | 0.01 | 41.12 | 0.02  | 0.05  | 4.17     |
| C21:0      | 0.11  | 0.03 | 27.91 | 0.06  | 0.16  | 0.08     |
| C20:4n6    | 0.11  | 0.04 | 35.10 | 0.06  | 0.18  | 0.89     |
| C20:5n3    | 0.06  | 0.02 | 28.15 | 0.04  | 0.10  | 0.30     |
| C24:0      | 0.08  | 0.03 | 41.56 | 0.03  | 0.13  | 0.70     |
| C22:5n3    | 0.12  | 0.03 | 25.43 | 0.07  | 0.17  | 0.18     |
| C22:6n3    | 0.04  | 0.01 | 36.59 | 0.02  | 0.06  | 1.56     |

SD= Standard Deviation; CV%= coefficient of variation; P5= 5<sup>th</sup> percentile; P95= 95<sup>th</sup> percentile
